# Supplementary material
Source: publisher figshare collection journal article supplement (https://tandf.figshare.com/articles/dataset/_/5457412)

**Supplementary Materials for “A Bayesian Phase I/II Trial Design  
for Immunotherapy” by Suyu Liu, Beibei Guo and Ying Yuan**

## Specification of admissibility probability cutoffs

In our simulation studies, we used cutoffs  $C_T = C_E = 0.05$ . To investigate the effect of higher cutoffs, we did sensitivity studies with  $C_T = C_E = 0.15$  and  $C_T = C_E = 0.3$ . Results are shown in Table S1. With higher cutoffs, the results are significantly worse for some scenarios such as scenarios 3 and 5 which had high percentages of inconclusive trials. Cutoffs  $C_T = C_E = 0.3$  yielded even worse results than cutoffs  $C_T = C_E = 0.15$ .

Table S1: Simulation results with higher cutoffs  $C_T$  and  $C_E$ .

|            | dose level         |             |             |             |             | %<br>inconclusive | dose level        |             |             |             |             | %<br>inconclusive |
|------------|--------------------|-------------|-------------|-------------|-------------|-------------------|-------------------|-------------|-------------|-------------|-------------|-------------------|
|            | 1                  | 2           | 3           | 4           | 5           |                   | 1                 | 2           | 3           | 4           | 5           |                   |
|            | $C_T = C_E = 0.15$ |             |             |             |             |                   | $C_T = C_E = 0.3$ |             |             |             |             |                   |
|            | scenario 1         |             |             |             |             |                   |                   |             |             |             |             |                   |
| Sel %      | 0.21               | <b>0.68</b> | 0.09        | 0.00        | 0.00        | 0.01              | 0.24              | <b>0.66</b> | 0.07        | 0.00        | 0.00        | 0.03              |
| # patients | 16.9               | <b>17.1</b> | 14.4        | 7.5         | 3.7         |                   | 17.3              | <b>17.9</b> | 14.5        | 5.8         | 3.3         |                   |
|            | scenario 2         |             |             |             |             |                   |                   |             |             |             |             |                   |
| Sel %      | 0.13               | 0.11        | <b>0.70</b> | 0.04        | 0.00        | 0.01              | 0.15              | 0.13        | <b>0.63</b> | 0.04        | 0.00        | 0.04              |
| # patients | 14.3               | 14.7        | <b>15.2</b> | 10.0        | 5.4         |                   | 16.4              | 15.9        | <b>14.9</b> | 7.4         | 3.6         |                   |
|            | scenario 3         |             |             |             |             |                   |                   |             |             |             |             |                   |
| Sel %      | 0.03               | 0.01        | 0.26        | <b>0.49</b> | 0.03        | 0.19              | 0.01              | 0.01        | 0.20        | <b>0.24</b> | 0.01        | 0.53              |
| # patients | 8.4                | 9.2         | 14.8        | <b>14.4</b> | 7.1         |                   | 6.4               | 7.1         | 11.8        | <b>10.4</b> | 4.1         |                   |
|            | scenario 4         |             |             |             |             |                   |                   |             |             |             |             |                   |
| Sel %      | 0.02               | 0.01        | 0.01        | 0.27        | <b>0.66</b> | 0.03              | 0.01              | 0.02        | 0.03        | 0.21        | <b>0.53</b> | 0.19              |
| # patients | 8.7                | 8.5         | 12.0        | 14.7        | <b>15.1</b> |                   | 8.1               | 7.6         | 10.6        | 12.1        | <b>12.3</b> |                   |
|            | scenario 5         |             |             |             |             |                   |                   |             |             |             |             |                   |
| Sel %      | 0.02               | 0.05        | <b>0.40</b> | <b>0.34</b> | 0.09        | 0.10              | 0.03              | 0.05        | <b>0.36</b> | <b>0.27</b> | 0.04        | 0.24              |
| # patients | 12.2               | 13.0        | <b>12.0</b> | <b>10.6</b> | 8.1         |                   | 11.5              | 12.6        | <b>11.9</b> | <b>8.7</b>  | 5.5         |                   |
|            | scenario 6         |             |             |             |             |                   |                   |             |             |             |             |                   |
| Sel %      | 0.02               | 0.01        | 0.11        | <b>0.33</b> | <b>0.51</b> | 0.02              | 0.01              | 0.01        | 0.09        | <b>0.39</b> | <b>0.43</b> | 0.07              |
| # patients | 10.3               | 11.2        | 12.2        | <b>12.7</b> | <b>12.7</b> |                   | 10.2              | 10.6        | 11.9        | <b>12.7</b> | <b>11.4</b> |                   |
|            | scenario 7         |             |             |             |             |                   |                   |             |             |             |             |                   |
| Sel %      | 0.20               | 0.03        | 0.04        | 0.11        | <b>0.63</b> | 0.00              | 0.25              | 0.02        | 0.05        | 0.08        | <b>0.57</b> | 0.03              |
| # patients | 13.9               | 11.9        | 11.2        | 11.2        | <b>11.7</b> |                   | 15.8              | 11.7        | 10.9        | 10.3        | <b>10.0</b> |                   |
|            | scenario 8         |             |             |             |             |                   |                   |             |             |             |             |                   |
| Sel %      | 0                  | 0           | 0           | 0           | 0           | 1                 | 0                 | 0           | 0           | 0           | 0           | 1                 |
| # patients | 3.3                | 3.0         | 1.7         | 0.6         | 0.1         |                   | 3.0               | 1.7         | 0.3         | 0.1         | 0.0         |                   |

Table S2: Simulation results with alternative prior estimates of  $\alpha'$ s in the Emax model.

|               | dose level                                                                          |              |              |              |              | dose level                                                                              |              |              |              |              |
|---------------|-------------------------------------------------------------------------------------|--------------|--------------|--------------|--------------|-----------------------------------------------------------------------------------------|--------------|--------------|--------------|--------------|
|               | 1                                                                                   | 2            | 3            | 4            | 5            | 1                                                                                       | 2            | 3            | 4            | 5            |
|               | $(\hat{\alpha}_0, \hat{\alpha}_1, \hat{\alpha}_2, \hat{\alpha}_3) = (2, 4, 0.4, 3)$ |              |              |              |              | $(\hat{\alpha}_0, \hat{\alpha}_1, \hat{\alpha}_2, \hat{\alpha}_3) = (1.5, 6, 0.6, 2.5)$ |              |              |              |              |
|               | scenario 1                                                                          |              |              |              |              |                                                                                         |              |              |              |              |
| Selection %   | 0.254                                                                               | <b>0.671</b> | 0.073        | 0            | 0            | 0.271                                                                                   | <b>0.642</b> | 0.087        | 0            | 0            |
| # of patients | 16.1                                                                                | <b>16.1</b>  | 14.1         | 8.8          | 4.9          | 16.2                                                                                    | <b>15.8</b>  | 14.1         | 9.2          | 4.7          |
|               | scenario 2                                                                          |              |              |              |              |                                                                                         |              |              |              |              |
| Selection %   | 0.121                                                                               | 0.106        | <b>0.728</b> | 0.042        | 0.003        | 0.123                                                                                   | 0.109        | <b>0.702</b> | 0.062        | 0.002        |
| # of patients | 12.8                                                                                | 14.1         | <b>14.5</b>  | 11.4         | 7.2          | 13.5                                                                                    | 14.2         | <b>14.8</b>  | 10.7         | 6.8          |
|               | scenario 3                                                                          |              |              |              |              |                                                                                         |              |              |              |              |
| Selection %   | 0.016                                                                               | 0.001        | 0.296        | <b>0.612</b> | 0.043        | 0.03                                                                                    | 0.007        | 0.276        | <b>0.595</b> | 0.05         |
| # of patients | 9.1                                                                                 | 9.8          | 14.6         | <b>16.0</b>  | 9.7          | 9.0                                                                                     | 9.8          | 15.1         | <b>15.5</b>  | 9.3          |
|               | scenario 4                                                                          |              |              |              |              |                                                                                         |              |              |              |              |
| Selection %   | 0.001                                                                               | 0.001        | 0.006        | 0.262        | <b>0.73</b>  | 0.012                                                                                   | 0.001        | 0.01         | 0.264        | <b>0.713</b> |
| # of patients | 8.1                                                                                 | 8.8          | 11.9         | 15.3         | <b>15.9</b>  | 8.4                                                                                     | 8.9          | 12.2         | 14.9         | <b>15.6</b>  |
|               | scenario 5                                                                          |              |              |              |              |                                                                                         |              |              |              |              |
| Selection %   | 0.032                                                                               | 0.042        | <b>0.420</b> | <b>0.439</b> | 0.053        | 0.026                                                                                   | 0.044        | <b>0.43</b>  | <b>0.416</b> | 0.07         |
| # of patients | 11.6                                                                                | 12.5         | <b>13.0</b>  | <b>12.3</b>  | 10.1         | 11.5                                                                                    | 12.7         | <b>13.0</b>  | <b>12.3</b>  | 10.1         |
|               | scenario 6                                                                          |              |              |              |              |                                                                                         |              |              |              |              |
| Selection %   | 0.002                                                                               | 0.009        | 0.091        | <b>0.408</b> | <b>0.486</b> | 0.005                                                                                   | 0.01         | 0.1          | <b>0.357</b> | <b>0.526</b> |
| # of patients | 10.4                                                                                | 11.0         | 12.6         | <b>13.1</b>  | <b>12.8</b>  | 10.1                                                                                    | 11.3         | 12.2         | <b>13.1</b>  | <b>13.1</b>  |
|               | scenario 7                                                                          |              |              |              |              |                                                                                         |              |              |              |              |
| Selection %   | 0.17                                                                                | 0.03         | 0.036        | 0.09         | <b>0.674</b> | 0.178                                                                                   | 0.01         | 0.036        | 0.07         | <b>0.706</b> |
| # of patients | 12.4                                                                                | 11.7         | 11.9         | 11.9         | <b>12.2</b>  | 11.9                                                                                    | 11.7         | 11.7         | 12.4         | <b>12.2</b>  |
|               | scenario 8                                                                          |              |              |              |              |                                                                                         |              |              |              |              |
| Selection %   | 0                                                                                   | 0            | 0            | 0            | 0            | 0                                                                                       | 0            | 0            | 0            | 0            |
| # of patients | 4.3                                                                                 | 3.2          | 2.9          | 2.1          | 0.8          | 4.4                                                                                     | 3.2          | 3.0          | 2.1          | 0.7          |

Table S3: Results using Gamma priors for  $\beta_1$  and  $\beta_2$ .

|               | dose level |              |              |              |              | dose level |       |              |              |              |
|---------------|------------|--------------|--------------|--------------|--------------|------------|-------|--------------|--------------|--------------|
|               | 1          | 2            | 3            | 4            | 5            | 1          | 2     | 3            | 4            | 5            |
|               | scenario 1 |              |              |              |              | scenario 2 |       |              |              |              |
| Selection %   | 0.273      | <b>0.644</b> | 0.079        | 0.000        | 0.002        | 0.162      | 0.103 | <b>0.708</b> | 0.026        | 0.003        |
| # of patients | 16.2       | <b>16.0</b>  | 14.3         | 8.8          | 4.7          | 13.6       | 14.1  | <b>15.0</b>  | 10.9         | 6.3          |
|               | scenario 3 |              |              |              |              | scenario 4 |       |              |              |              |
| Selection %   | 0.033      | 0.001        | 0.326        | <b>0.552</b> | 0.028        | 0.007      | 0.003 | 0.026        | 0.401        | <b>0.521</b> |
| # of patients | 9.9        | 9.7          | 14.7         | <b>15.4</b>  | 8.3          | 9.6        | 8.7   | 12.2         | 13.6         | <b>13.7</b>  |
|               | scenario 5 |              |              |              |              | scenario 6 |       |              |              |              |
| Selection %   | 0.034      | 0.042        | <b>0.456</b> | <b>0.408</b> | 0.044        | 0.020      | 0.004 | 0.074        | <b>0.440</b> | <b>0.460</b> |
| # of patients | 12.3       | 12.3         | <b>13.1</b>  | <b>12.0</b>  | 9.8          | 10.6       | 11.1  | 12.4         | <b>12.8</b>  | <b>13.1</b>  |
|               | scenario 7 |              |              |              |              | scenario 8 |       |              |              |              |
| Selection %   | 0.261      | 0.028        | 0.052        | 0.135        | <b>0.516</b> | 0.000      | 0.000 | 0.000        | 0.000        | 0.000        |
| # of patients | 13.6       | 12.2         | 11.4         | 11.2         | <b>11.2</b>  | 4.7        | 0.4   | 0.0          | 0.0          | 0.0          |

Table S4: Results using truncated normal priors for  $\beta_1$  and  $\beta_2$ .

|               | dose level |              |              |              |              | dose level |       |              |              |              |
|---------------|------------|--------------|--------------|--------------|--------------|------------|-------|--------------|--------------|--------------|
|               | 1          | 2            | 3            | 4            | 5            | 1          | 2     | 3            | 4            | 5            |
|               | scenario 1 |              |              |              |              | scenario 2 |       |              |              |              |
| Selection %   | 0.251      | <b>0.658</b> | 0.087        | 0.001        | 0.001        | 0.149      | 0.103 | <b>0.718</b> | 0.029        | 0.001        |
| # of patients | 15.9       | <b>16.1</b>  | 14.3         | 8.9          | 4.7          | 13.9       | 14.6  | <b>15.0</b>  | 10.6         | 5.9          |
|               | scenario 3 |              |              |              |              | scenario 4 |       |              |              |              |
| Selection %   | 0.036      | 0.004        | 0.350        | <b>0.534</b> | 0.028        | 0.018      | 0.002 | 0.026        | 0.462        | <b>0.462</b> |
| # of patients | 10.3       | 10.5         | 14.8         | <b>14.9</b>  | 7.8          | 11.0       | 9.7   | 11.7         | 13.0         | <b>13.0</b>  |
|               | scenario 5 |              |              |              |              | scenario 6 |       |              |              |              |
| Selection %   | 0.028      | 0.046        | <b>0.558</b> | <b>0.340</b> | 0.012        | 0.007      | 0.021 | 0.103        | <b>0.453</b> | <b>0.414</b> |
| # of patients | 12.5       | 12.8         | <b>13.1</b>  | <b>11.9</b>  | 9.2          | 10.6       | 11.4  | 12.6         | <b>12.9</b>  | <b>12.4</b>  |
|               | scenario 7 |              |              |              |              | scenario 8 |       |              |              |              |
| Selection %   | 0.256      | 0.030        | 0.072        | 0.132        | <b>0.502</b> | 0.000      | 0.000 | 0.000        | 0.000        | 0.000        |
| # of patients | 14.0       | 12.2         | 11.6         | 10.5         | <b>11.2</b>  | 4.9        | 0.3   | 0.0          | 0.0          | 0.0          |

Figure S1: Selection percentage and the average number of patients treated at each dose level under cohort sizes of 3 and 1. Each row represents a scenario. In each plot, the two bars from left to right represent cohort size of 3 and 1, respectively.

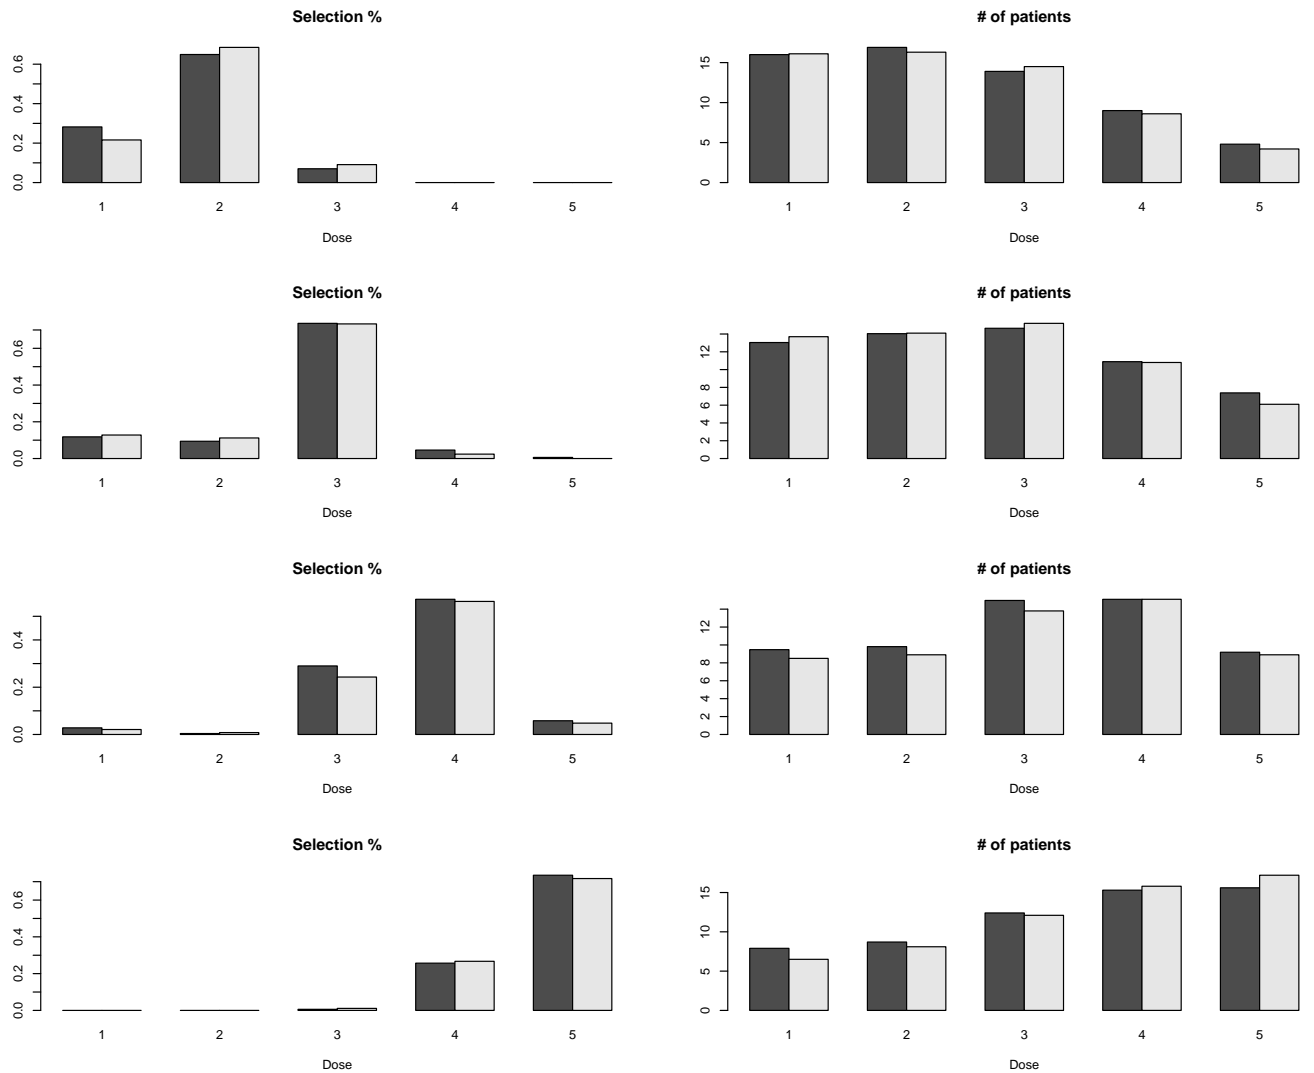

Figure S1 continued.

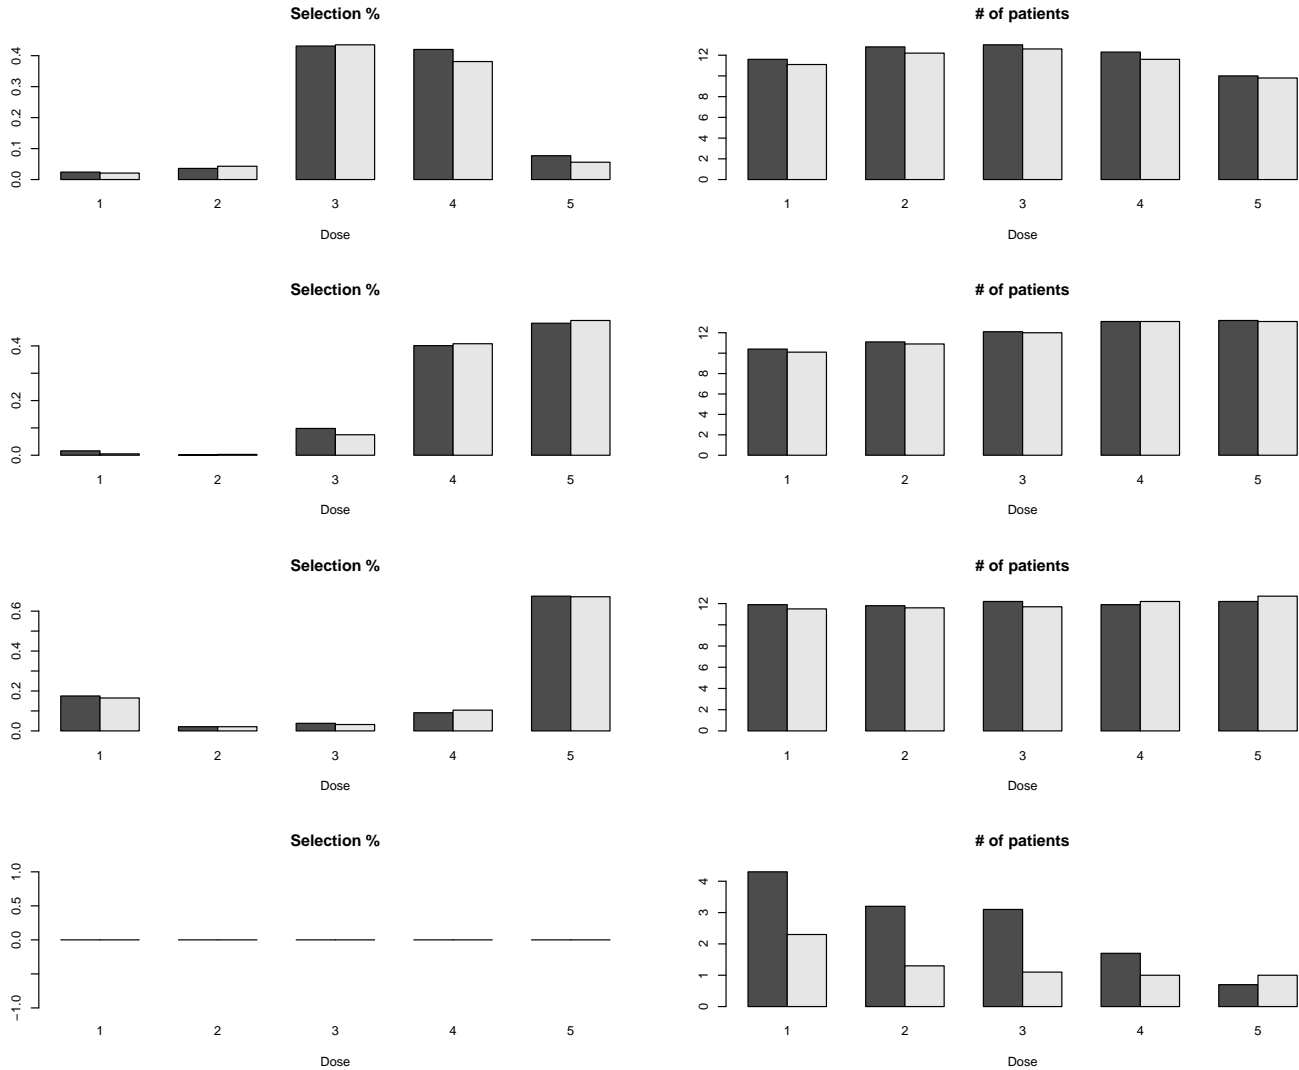

Supplement: Supplementary file 2 [file UASA_A_1383260_Supplement.pdf › UASA_A_1383260_Supplement.pdf]
