# Supplementary material
Source: publisher figshare collection journal article supplement (https://tandf.figshare.com/articles/dataset/_/5457412)
Supplement: Supplementary file 1 [file 1383260_ACC_Form.pdf › 1383260_ACC_Form.pdf]

## JASA ACS Reproducibility Initiative - Author Contributions Checklist Form

The purpose of the Author Contributions Checklist (ACC) Form is to document the code and data supporting a manuscript, and describe how to reproduce its main results.

As of Sept. 1, 2016, the ACC Form must be included with all new submissions to JASA ACS.

This document is the initial version of the template that will be provided to authors. The JASA Associate Editors for Reproducibility will update this document with more detailed instructions and information about best practices for many of the listed requirements over time.

### Data

**Abstract (Mandatory)**      [This is a trial design paper. No data are involved.](#)

Short high level description

#### **Availability (Mandatory)**

Restrictions (if data will not be made publicly available, justify why not)

#### **Description (Mandatory if data available)**

Permissions (demonstrate that author has legitimate access to data)

Licensing information

Link to data (e.g., dataverse.org, datadryad.org; this need not be the actual link at time of submission but if not, it should indicate where the data will be deposited if the manuscript is accepted)

Data provenance, including identifier or link to original data if different than above

File format

Metadata (including data dictionary)

Version information

#### **Optional Information (complete as necessary)**

Unique identifier / DOI

### Code

**Abstract (Mandatory)**      [The code is used to generate the simulation results in Section 3 and Table 2. The code has been uploaded to the JASA submission website.](#)

Short high level description

#### **Description (Mandatory)**

How delivered (R package, Shiny app, etc.)      [R functions](#)

Licensing information (default is MIT License)      [MIT License](#)

Link to code/repository (e.g., github.com, bitbucket.org; this need not be the actual link at time of submission but if not, it should indicate where the code will be deposited if the manuscript is accepted)

[The code will be deposited to the corresponding author's or publisher's website.](#)

Version information (e.g., for a Git repository, the number or branch+commit) [N/A](#)

**Optional Information (complete as necessary)**

Hardware requirements (e.g., operating system with version number, access to cluster, GPUs, etc.)

Supporting software requirements (e.g., libraries and dependencies, including version numbers)

Unique identifier/DOI

## Instructions for Use

**Reproducibility (Mandatory)**

What is to be reproduced (e.g., "All tables and figure from paper", "Tables 1-4", etc.) [All simulation results](#)

How to reproduce analyses (e.g., workflow information, makefile, wrapper scripts) [in Table 2.](#)

[Run the R code.](#)

**Replication (Optional)**

How to use software in other settings (or links to such information, e.g., R package vignettes, demos or other examples)

## Notes

Other relevant information, in particular how to access the data and code if not yet made publicly available.
